# Supplementary material
Source: PubMed Central journal article supplement (PMC2724075)
Supplement: NIHMS132086-supplement-Supplemental_Figures.pdf [file NIHMS132086-supplement-Supplemental_Figures.pdf]

# Supp. Figure 1

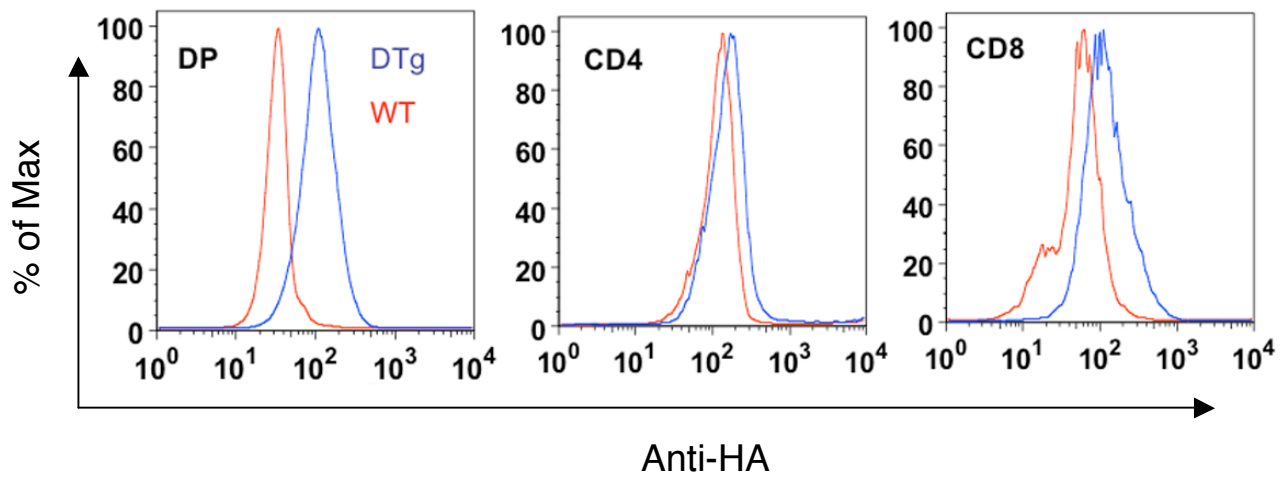

**Supp. Fig. 1:** Intracellular staining of 1017-DRAK2 thymocytes with anti-HA mAbs reveals highest differential expression in the double-positive subset. Wildtype (WT) or 1017-DRAK2 transgenic (DTg) thymocytes were harvested and stained with anti-CD4 and anti-CD8, followed by fixation, permeabilization, and staining with anti-HA mAbs.

# Supp. Figure 2

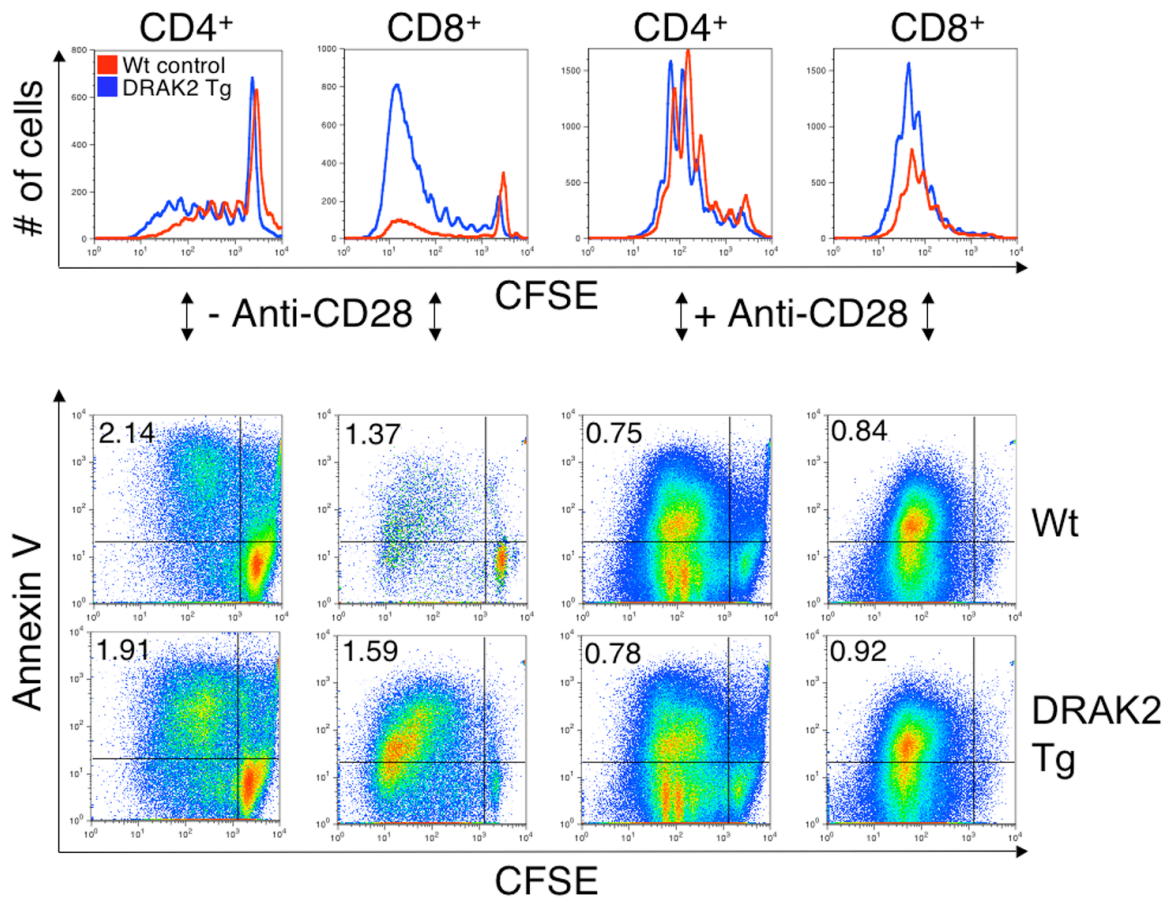

**Supp. Fig. 2:** Cell cycle progression vs. apoptosis of 1017-DRAK2 vs. wildtype splenic T cells. Top panel: histograms of CFSE dilution of live-gated CD4 and CD8 T cells of indicated genotype following 4d of stimulation with anti-CD3 +/- anti-CD28 as indicated. Bottom panel: Annexin-V vs. CFSE analyses of non-live-gated samples as in top panels. Numbers in upper left quadrants represent the ratio of CFSE diluted Annexin-V<sup>Hi</sup> vs. Annexin-V<sup>Lo</sup> cells.

# Supp. Figure 3

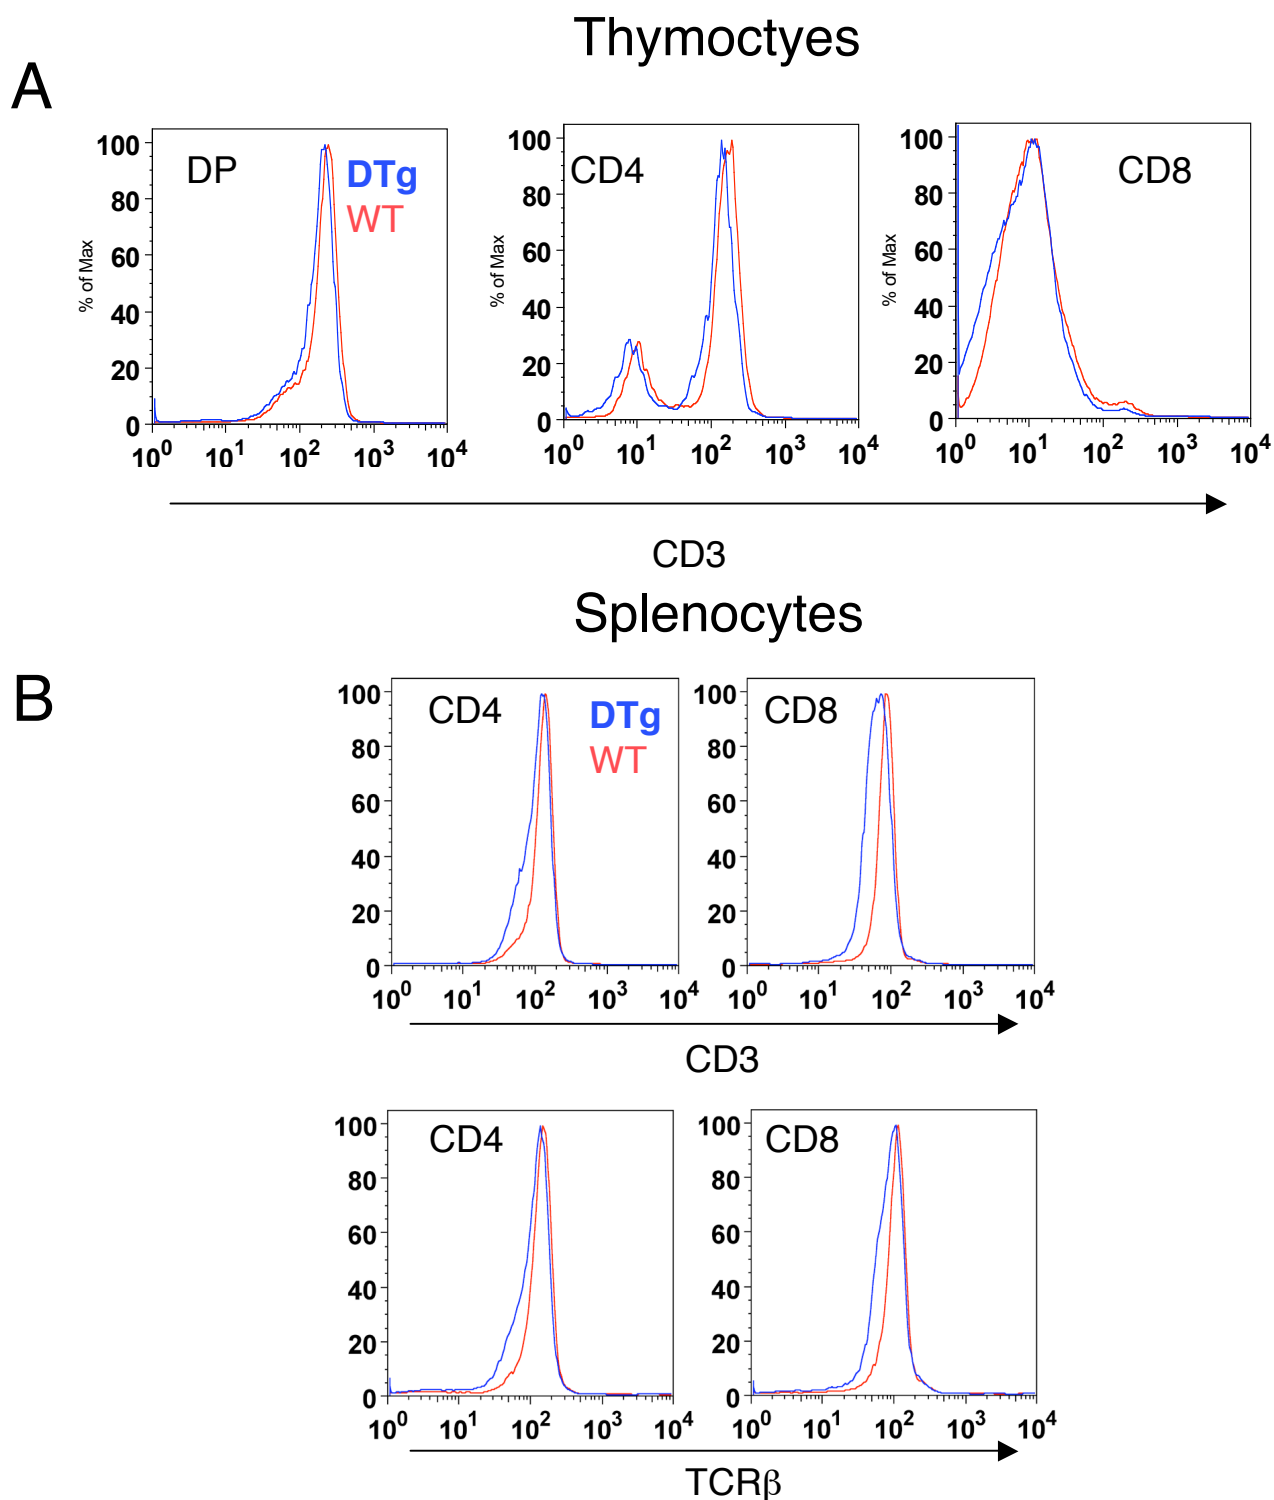

**Supp. Fig. 3:** CD3 and TCR expression on 1017-DRAK2 vs. wildtype thymocytes and splenic T cells. **A** Similar surface CD3 levels between wildtype and 1017-DRAK2 thymocyte subsets. **B** Comparison of CD3 and TCR $\beta$  surface expression on wildtype vs. 1017-DRAK2 splenic T cell subsets.

# Supp. Figure 4

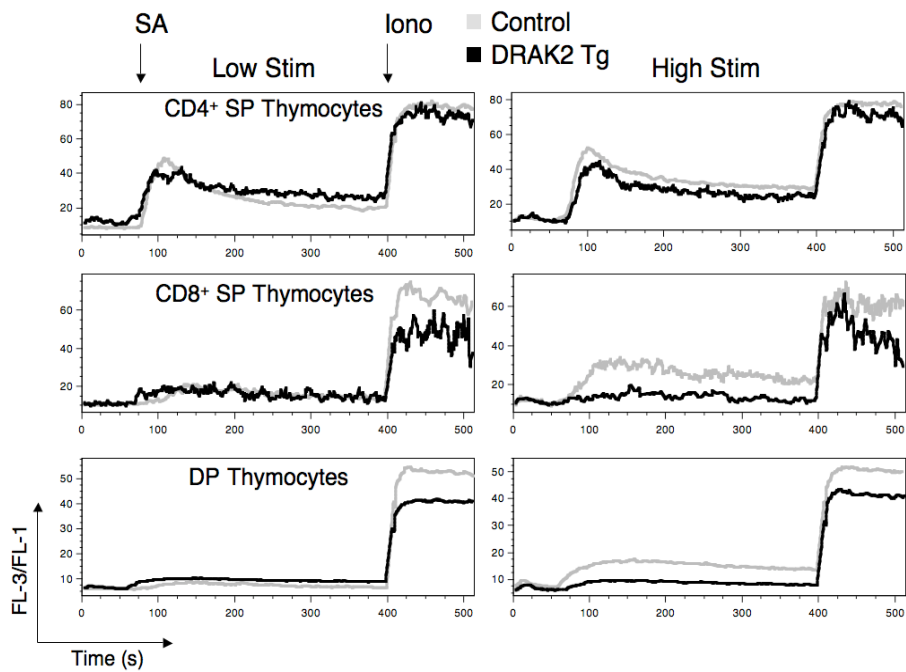

**Supp. Fig. 4:** Calcium mobilization in thymocyte subsets responding to low (0.2  $\mu\text{g/ml}$ ) vs. high (1.0  $\mu\text{g/ml}$ ) anti-CD3 stimulation.

# Supp. Figure 5

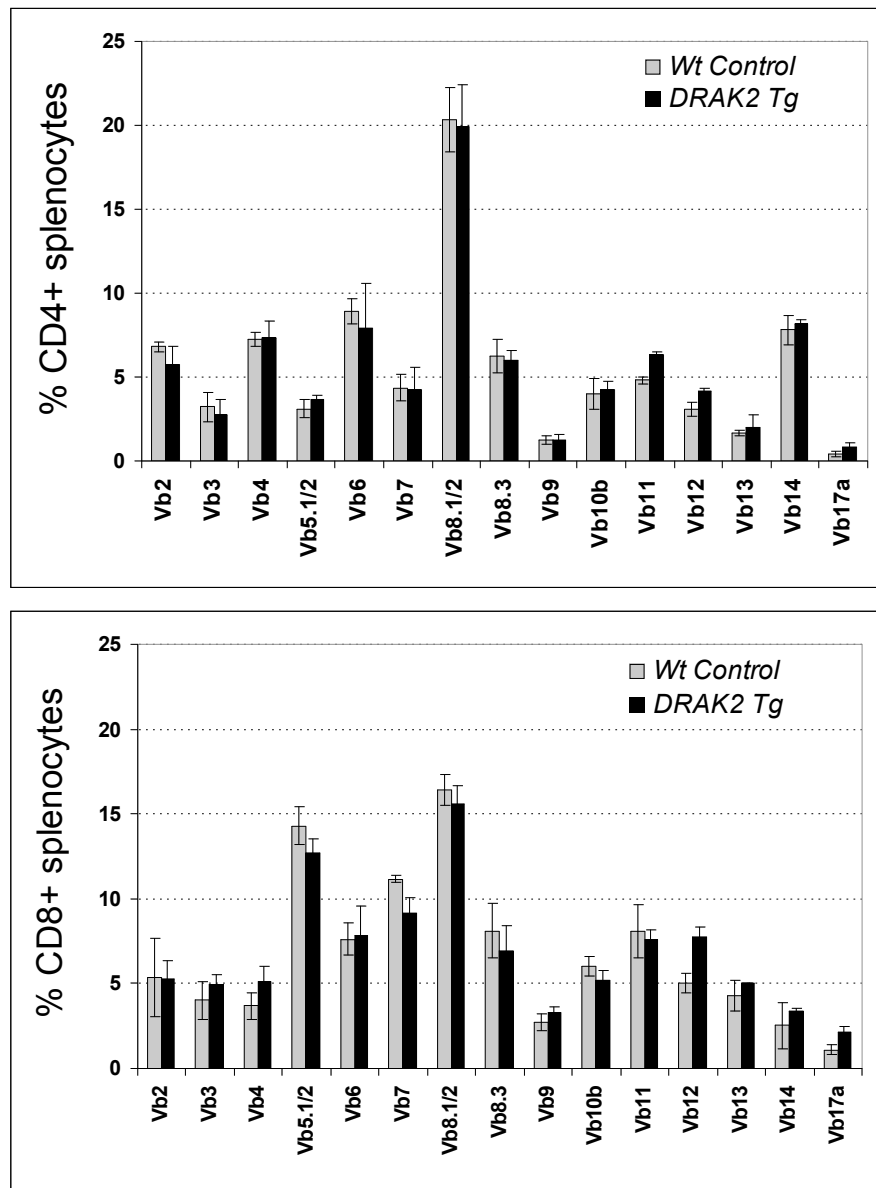

**Supp. Fig. 5:** Vβ usage in CD4 vs. CD8 splenocyte T cell subsets from young (4-8 week old) 1017-DRAK2 vs. wildtype mice. Mean % expression +/- SEM presented.
